# Supplementary material
Source: PubMed Central journal article supplement (PMC5802336)
Supplement: NIHMS938924-supplement-Appendix.pdf [file NIHMS938924-supplement-Appendix.pdf]

# **Supplementary appendix: Cost-effectiveness of hepatitis C treatment for patients in early stages of liver disease**

## **Contents of Supplementary Appendix**

|                                                                                |    |
|--------------------------------------------------------------------------------|----|
| Appendix A. Natural mortality probabilities .....                              | 2  |
| Appendix B. Fibrosis progression rate estimation .....                         | 3  |
| Appendix C. The effect of HCV-infection status on developing ESLD.....         | 6  |
| Appendix D. Effect of HCV status and ESLD on quality adjusted life years ..... | 7  |
| Appendix E. Cost-effectiveness calculations.....                               | 9  |
| Appendix F. Comparing immediate treatment to no treatment .....                | 11 |
| Appendix G: Additional sensitivity analyses.....                               | 12 |
| Appendix H. Additional threshold analyses .....                                | 14 |
| Appendix I. Additional notes .....                                             | 18 |
| References.....                                                                | 21 |

The findings and conclusions in this report are those of the authors and do not necessarily represent the views of the Centers for Disease Control and Prevention.

## Appendix A. Natural mortality probabilities

Since the cost-effectiveness model uses a single-year time-step, five-year probabilities ( $P_{5yr}$ ) for natural mortality at a given age group were taken from literature<sup>1</sup> and converted to annual probabilities ( $P_{1yr}$ ) according to the following:

$$[1] \quad P_{1yr} = 1 - (1 - P_{5yr})^{1/5}$$

These one-year probabilities are then associated with patients belonging to a particular age group (Table A1).

**Table A1. Annual probabilities of a natural mortality given a patient's age.\***

| Age Group | Probability |
|-----------|-------------|
| 18-20     | 0.000       |
| 20-25     | 0.001       |
| 26-30     | 0.001       |
| 31-35     | 0.001       |
| 36-40     | 0.001       |
| 41-45     | 0.002       |
| 46-50     | 0.003       |
| 51-55     | 0.005       |
| 56-60     | 0.007       |
| 60-65     | 0.010       |
| 66-70     | 0.015       |
| 71-75     | 0.024       |
| 76-80     | 0.038       |
| 81-85     | 0.062       |
| 86-90     | 0.107       |
| 91-95     | 0.174       |
| 96-120    | 0.263       |

\* Source of mortality rates is National Vital Statistics Reports.<sup>1</sup>

## Appendix B. Fibrosis progression rate estimation

State transitions between stages of liver disease have been estimated in the literature many times.<sup>2-5</sup> We chose to estimate progression rates from the Chronic Hepatitis Cohort Study (CHeCS)<sup>6</sup> because the CHeCS cohort contains a relatively large number of hepatitis C mono-infected individuals from the US who are born between 1945 and 1965, which is the population of greatest interest to our study. Simple statistics about the biopsy records from CHeCS are presented in Table B1.

**Table B1. Descriptive statistics of biopsy scores among hepatitis C patients from the Chronic Hepatitis Cohort Study (CHeCS) by fibrosis level.**

| Fibrosis stage | N    | Portion |
|----------------|------|---------|
| 0              | 466  | 0.199   |
| 1              | 614  | 0.263   |
| 2              | 414  | 0.177   |
| 3              | 234  | 0.100   |
| 4              | 611  | 0.261   |
| All            | 2339 | 1.000   |

Mean biopsy score: 1.96  
Mean patient age: 49.59

The procedure used to estimate the progression rates from biopsy scores is described in detail by Yi et al.<sup>2</sup> Our implementation of the Yi et al.<sup>2</sup> estimation procedure carries two assumptions worth additional discussion. First, for a given sample of biopsies the average infection period is assumed to be the same for all biopsy scores. For this reason, we only estimate progression rates from CHeCS using each patient's first biopsy. Using the second and third biopsies would not be reasonable given the estimation procedure's necessary assumption of a single, average infection period. The second assumption is that initial fibrosis levels (fibrosis at the time of infection) is assumed to be F0. And by extension, this assumption imposes progression-only direction of disease development (i.e., any fibrosis regression cannot be accommodated). Estimation results are presented in Table B2.

**Table B2. Stage-specific fibrosis progression transition probabilities estimated from hepatitis C patients in the Chronic Hepatitis Cohort Study (CHeCS) using the maximum likelihood method described by Yi et al.<sup>2</sup> \***

*Assuming infection period is 25 years*

| Liver Disease Stage Transition Parameter | Estimated transition probability | SE    | Approximate 95% Confidence Interval |       |
|------------------------------------------|----------------------------------|-------|-------------------------------------|-------|
|                                          |                                  |       | Low                                 | High  |
| F0 to F1                                 | 0.065                            | 0.003 | 0.059                               | 0.070 |
| F1 to F2                                 | 0.081                            | 0.005 | 0.071                               | 0.091 |
| F2 to F3                                 | 0.128                            | 0.011 | 0.106                               | 0.149 |
| F3 to F4                                 | 0.214                            | 0.025 | 0.165                               | 0.262 |

\* These estimations assume an average infection period of 25 years. The average age of biopsied patients in CHeCS is 49.6 years. SE refers to standard error.

As a check on the use of progression rates estimated from CHeCS, Table B3 presents annual transition probabilities between liver disease stages, calculated from CHeCS-based progression rates and also from recent sources from a meta-analysis of stage transition probabilities by Thein et al.<sup>3</sup> The CHeCS-based rates are comparable to those developed in the literature. For this study, neither the disease progression rates from CHeCS nor those from the literature are adjusted for any characteristics, such as gender, age, or alcohol consumption. In this way, the disease progression rates estimated from CHeCS include the effects of all patient-level characteristics that may influence disease progression.

Table B3 ensures us that CHeCS-based rates are reasonable given previous estimates from the literature. We also evaluate the cost-effectiveness model with CHeCS-based rates and literature-based rates to investigate whether the rates imply any economically-significant differences in outcomes. Those model results are presented in Table B4. The most important outcome in Table B4 is that the values are similar when comparing scenarios that utilize CHeCS-based transition probabilities and transition probabilities based on the “Mid” values from Thein et al.<sup>3</sup> Since the CHeCS-based rates are slightly lower than the “Mid” values from the literature, the cost effectiveness ratios using the

progression rates calculated from CHeCS data are slightly higher. In our model, lower rates of disease progression produce lower disease burdens and thereby yield higher (i.e., less desirable) cost-effectiveness ratios with respect to early treatment. This pattern can be observed in the “Low” and “High” progression rate-based scenarios. The greatest cost effectiveness ratios are produced using the lowest progression rate assumptions (“Low” from Thein et al.), and the smallest cost-effectiveness ratios are produced using the most rapid progression rate assumptions (“High” from Thein et al.). Notice in all but the “High” scenario, comparing treatment at F1 to F2 results in a dominated strategy when a patient starts at F0.

**Table B3. Annual transition probabilities for liver disease stages from CHeCS and literature sources.<sup>3</sup>**

| Liver disease stage transition parameter | Thein et al. (2008) <sup>3</sup> |       |       |       |
|------------------------------------------|----------------------------------|-------|-------|-------|
|                                          | CHeCS                            | Mid   | Low   | High  |
| F0 to F1                                 | 0.065                            | 0.117 | 0.041 | 0.155 |
| F1 to F2                                 | 0.081                            | 0.085 | 0.044 | 0.111 |
| F2 to F3                                 | 0.128                            | 0.120 | 0.092 | 0.201 |
| F3 to F4                                 | 0.214                            | 0.116 | 0.068 | 0.187 |

**Table B4. Cost-effectiveness results for treatment of hepatitis C patients in early stages of liver disease using different estimates for transition probabilities for liver disease stages.**

| Source of liver disease stage transitions | <i>Incremental CE Ratios (\$/QALY)</i> |                 |                      |                         |                 |                         |
|-------------------------------------------|----------------------------------------|-----------------|----------------------|-------------------------|-----------------|-------------------------|
|                                           | Patients starting at F0                |                 |                      | Patients starting at F1 |                 | Patients starting at F2 |
|                                           | Tx at F2 vs. F3                        | Tx at F1 vs. F2 | Tx at F0 vs. F2      | Tx at F2 vs. F3         | Tx at F1 vs. F2 | Tx at F2 vs. F3         |
| CHeCS                                     | 97,891                                 | <sup>a</sup>    | 242,856              | 59,482                  | 174,104         | 37,349                  |
| Thein et al. (2008) <sup>3</sup> Mid      | 136,338                                | <sup>a</sup>    | 232,327              | 97,385                  | 197,306         | 64,929                  |
| Low                                       | 274,335                                | <sup>a</sup>    | 288,057              | 180,824                 | 251,072         | 112,339                 |
| High                                      | 54,549                                 | 164,701         | 196,140 <sup>b</sup> | 39,096                  | 133,667         | 26,365                  |

<sup>a</sup>. Treating at F1 vs F2 is weakly dominated in this scenario by treating at F0 vs F1, so the appropriate ICER to calculate compares treatment at F0 vs F2.

<sup>b</sup>. This ICER represents treatment at F0 vs F1 because for these assumptions on liver disease stage transitions, treatment at F0 vs F1 did not dominate treatment at F1 vs F2.

**Appendix C. The effect of HCV-infection status on developing ESLD**

Recent studies have investigated the effect of HCV-infection status on the development of end stage liver disease, in particular hepatocellular carcinoma<sup>7,8</sup> and decompensated cirrhosis.<sup>8</sup> To adjust the transition probability from compensated cirrhosis to ESLD for HCV-uninfected patients, we calculate the proportional difference in published transition probabilities between infected and uninfected patients from Morgan et al. for liver cancer<sup>7</sup> and van der Meer et al. for decompensated cirrhosis.<sup>8</sup> This proportional difference is applied to the transition probabilities calculated from HCV-infected patients in CHeCS, which is described in Appendix C to produce the model parameter for the probability of transitioning from compensated cirrhosis (F4) to one of the ESLD states.

**Table C1. Annual transition probabilities from compensated cirrhosis to end stage liver disease used to calculate the effect of a sustained virologic response**

| Annual transition probabilities from decompensated cirrhosis to hepatocellular carcinoma |                  | Proportional Difference | Source       |
|------------------------------------------------------------------------------------------|------------------|-------------------------|--------------|
| Infected                                                                                 | Uninfected (SVR) |                         |              |
| 0.178                                                                                    | 0.042            | 0.764                   | <sup>7</sup> |
| Annual transition probabilities from compensated to decompensated cirrhosis              |                  | Proportional Difference | Source       |
| Infected                                                                                 | Uninfected (SVR) |                         |              |
| 0.036                                                                                    | 0.003            | 0.913                   | <sup>8</sup> |

## **Appendix D. Effect of HCV status and ESLD on quality adjusted life years**

In the base case scenario, HCV-infected patients are subjected to a reduction in quality of life of 2% relative to HCV-uninfected (Table D1). This is implemented in the model by using a multiplier of 0.98 on QALYs for HCV-infected individuals; which is to say, 0.98 is multiplied by the HCV-uninfected QALY value associated with a given liver disease stage. An assumption that HCV infection status confers reductions in quality of life is consistent with previously published cost-effectiveness studies<sup>9,10,11</sup> as well as previous studies that measure health related quality of life.<sup>12-14</sup> In particular, our model is a clinical model, where HCV infection status is presumed to be known by the patient. So even though some studies have found negligible quality of life reductions associated with HCV-infected patients when the patient's HCV infection status is unknown to them,<sup>15</sup> our model only considers patients who have been diagnosed. As diagnosed patients, they may incur physical as well as psychological reductions in their quality of life due to either the knowledge of their HCV infection status, or the physical symptoms of infection, or both. Studies have documented the harmful effects of HCV infection on a patient's psychological well-being<sup>16</sup> as well as reductions in health related quality of life measurements following a positive diagnosis.<sup>17</sup> Furthermore, a portion of the reductions in quality of life from hepatitis C have been documented to rebound, or recover, following successful treatment and a patient's achieving a sustained virologic response.<sup>18</sup>

**Table D1. Parameter values for quality adjusted life years.**

| Parameter description                                          | Relevant fibrosis or ESLD stage(s) | Values    |      |      | Source(s)           |
|----------------------------------------------------------------|------------------------------------|-----------|------|------|---------------------|
|                                                                |                                    | Base case | Low  | High |                     |
| <i>Annual QALY values</i>                                      |                                    |           |      |      |                     |
| HCV-uninfected patients                                        | 0, 1, 2, 3                         | 0.88      | 0.72 | 1.00 | 9,19                |
|                                                                | 4                                  | 0.73      | 0.55 | 0.89 |                     |
| HCV-infected patients                                          | 0, 1, 2, 3                         | 0.86      | 0.72 | 0.95 |                     |
|                                                                | 4                                  | 0.73      | 0.55 | 0.89 |                     |
| Patients with end stage liver disease                          | HCC                                | 0.38      | 0.09 | 0.81 |                     |
|                                                                | DC                                 | 0.60      | 0.45 | 0.81 |                     |
|                                                                | LT                                 | 0.66      | 0.45 | 0.86 |                     |
| <i>Adjustment to QALYs relative to HCV-uninfected patients</i> |                                    |           |      |      |                     |
| HCV-infected patients                                          | 0, 1, 2, 3                         | 0.98      | 0.72 | 1.00 | Computed from above |
|                                                                | 4                                  | 0.98      | 0.62 | 1.00 |                     |
| Patients with end stage liver disease                          | HCC                                | 0.52      | 0.10 | 0.91 |                     |
|                                                                | DC                                 | 0.82      | 0.51 | 0.91 |                     |
|                                                                | LT                                 | 0.90      | 0.51 | 0.97 |                     |



## Appendix E. Cost-effectiveness calculations

Cost-effectiveness analysis has been used to evaluate health care interventions for decades.<sup>20</sup>

This study applies these standard methods to a set of HCV-related treatment policies. The HCV treatment policies were characterized by the stage of liver fibrosis that a patient initiates HCV treatment. Those stages were defined as being at F0, F1, F2, F3, or F4. After costs and health outcomes were estimated with the model, any pair of policies could be evaluated using the formula for incremental (or marginal) cost effectiveness:<sup>21,22</sup>

$$[1] \quad (Cost_A - Cost_B)/(Outcomes_A - Outcomes_B).$$

Policy A and policy B could be, for example, initiating therapy at F2 and initiating therapy at F3.

The costs and outcomes used in equation 1 were estimated in the model using equations 2 and 3:

$$[2] \quad Cost_A = \sum_t \left( (\sum_{f,p} (F_{f,p} Cost_{f,p}) + \sum_v (V_v Cost_v) + \sum_{tx} (Tx_{tx} Cost_{tx})) (1 + d)^{-t} \right).$$

The per-person non-treatment-related medical costs ( $Cost_{f,p}$ ) at each stage of liver disease,  $f$ , in each population compartment,  $p$ , were multiplied by the population level ( $F_{f,p}$ ) in each stage and compartment. Similarly, the per-person non-treatment-related medical costs ( $Cost_v$ ) associated with of the end stage liver disease states ( $v$ ) were multiplied by the appropriate population size ( $V_v$ ). Per-person treatment costs ( $Cost_{tx}$ ) were multiplied the number of patients in treatment ( $Tx_{tx}$ ) in each of the two possible treatment compartments, represented by  $tx$ . These three values were summed together for every year ( $t$ ) and adjusted to present values terms according to the discount rate ( $d$ ).

$$[3] \quad QALY_A = \sum_t \left( (\sum_{f,p} (F_{f,p} QALY_{f,p}) + \sum_v (V_v QALY_v)) (1 + d)^{-t} \right).$$

Equation 3 sums up the QALYs from all the population compartments ( $p$ ), early stage liver disease states ( $f$ ), and end stage liver disease states ( $v$ ). These annual amounts were discounted every

year ( $t$ ) at the discount rate ( $d$ ). The costs and QALY values for comparator policy, such as policy B represented in equation 1, were calculated using the same equations as 2 and 3.

For this cost-effectiveness study, we used a societal perspective, which included all medical costs regardless of who incurred the costs and the quality of life of the patients. For this study, we did not include productivity costs, patient time or travel costs, for which data were not available. All future outcomes, including costs and QALYs were discounted at 3%. All costs were adjusted to US\$2012 using the health care component of the Personal Consumption Expenditure index.<sup>23</sup>

## Appendix F. Comparing immediate treatment to no treatment

Some clinicians may be interested in results that represent a situation where delaying treatment is not an option. In such a case, the choice must be made to initiate HCV treatment at diagnosis or forego treatment altogether. Table F1 presents results centered on this possibility. Average cost-effectiveness ratios are calculated comparing treatment at a given fibrosis level to a no-treatment scenario.

**Table F1. Base case results from cost effectiveness model for a 55 year old HCV patient where treatment at a given fibrosis stage is compared to no treatment at all in US\$2012.**

|                                     | Patients starting at F0 |                       | Patients starting at F1 |                      | Patients starting at F2 |                       |
|-------------------------------------|-------------------------|-----------------------|-------------------------|----------------------|-------------------------|-----------------------|
|                                     | No Tx                   | Tx at F0              | No Tx                   | Tx at F1             | No Tx                   | Tx at F2              |
| Non-treatment costs (\$)            | 13,651                  | 7,855                 | 20,173                  | 7,977                | 30,479                  | 8,820                 |
| Discounted treatment costs (\$)     | -                       | 105,293               | -                       | 105,180              | -                       | 104,731               |
| Total costs (\$)                    | 13,651                  | 113,149               | 20,173                  | 113,157              | 30,479                  | 113,551               |
| Liver disease-related deaths        | 0.05                    | 0.00                  | 0.14                    | 0.00                 | 0.28                    | 0.01                  |
| QALYs                               | 15.45                   | 16.37                 | 14.37                   | 16.35                | 12.34                   | 16.22                 |
| <i>Treatment policies compared:</i> |                         | Tx at F0 vs.<br>No Tx |                         | Tx at F1<br>vs.No Tx |                         | Tx at F2 vs.<br>No Tx |
| Average CE Ratio (\$/Averted death) |                         | 1,839,778             |                         | 675,307              |                         | 309,680               |
| Average CE Ratio (\$/QALY)          |                         | 108,774               |                         | 47,014               |                         | 21,409                |

## **Appendix G: Additional sensitivity analyses**

In addition to the sensitivity analyses presented in the main text, we also conducted additional multi-way sensitivity analyses which are presented in this appendix. We varied all epidemiologic parameters simultaneously such that all epidemiologic parameters were assumed to be favorable to treatment or unfavorable to treatment. Broad ranges were found between the ICERs values calculated from scenarios assuming high and low (or favorable and unfavorable) parameter assumptions when both economic and epidemiologic parameters were varied together. For the scenarios where patients were diagnosed and treated at F0, the largest ranges were found when the following parameter groups were varied: quality of life assumptions (\$14,300/QALY and \$211,782,000/QALY), treatment costs (\$77,100/QALY and \$793,500), and the discount rate (\$34,200/QALY and \$693,600/QALY) (Table G1).

**Table G1. Results of multi-way sensitivity analyses on health economic parameters stratified by scenarios that are favorable and unfavorable with respect to the epidemiologic parameters.\***

|                                         |                    | Scenarios on all epidemiologic parameters |                                   |                                   |                                       |                                   |                                   |
|-----------------------------------------|--------------------|-------------------------------------------|-----------------------------------|-----------------------------------|---------------------------------------|-----------------------------------|-----------------------------------|
|                                         |                    | Epidemiologic parameters favors Tx        |                                   |                                   | Epidemiologic parameters disfavors Tx |                                   |                                   |
| Parameter group varied                  | Parameter scenario | Patients with F0, Tx at F0 vs. F1         | Patients with F1, Tx at F1 vs. F2 | Patients with F2, Tx at F2 vs. F3 | Patients with F0, Tx at F0 vs. F1     | Patients with F1, Tx at F1 vs. F2 | Patients with F2, Tx at F2 vs. F3 |
| All health economic parameters          | Base case          | 158,666                                   | 79,638                            | 10,983                            | 527,383†                              | 457,926                           | 207,340                           |
| Medical costs for chronic liver disease | Low                | 156,100                                   | 78,464                            | 10,860                            | 524,308†                              | 455,131                           | 208,118                           |
|                                         | High               | 118,838                                   | 55,218                            | Cost-saving                       | 480,310†                              | 409,470                           | 141,634                           |
| Medical costs for ESLD                  | Low                | 159,112                                   | 81,110                            | 13,118                            | 527,407†                              | 458,023                           | 208,400                           |
|                                         | High               | 158,034                                   | 77,556                            | 7,962                             | 527,350†                              | 457,791                           | 205,855                           |
| Treatment costs                         | Low                | 77,061                                    | 37,855                            | 3,891                             | 261,259†                              | 226,458                           | 100,240                           |
|                                         | High               | 240,270                                   | 121,421                           | 18,075                            | 793,507†                              | 689,394                           | 314,440                           |
| Quality of life assumptions‡            | Favors Tx          | 14,340†                                   | 12,755                            | 5,546                             | 38,097†                               | 34,233                            | 28,137                            |
|                                         | Disfavor Tx        | 1,036,709                                 | 158,019                           | 14,091                            | 211,782,018                           | 9,116,268                         | 390,328                           |
| Discount rate                           | Low                | 34,209                                    | 16,896                            | 559                               | 300,598†                              | 214,998                           | 56,554                            |
|                                         | High               | 251,099                                   | 137,546                           | 22,660                            | 693,627†                              | 632,865                           | 332,285                           |

\* This table presents the incremental cost effectiveness ratios comparing two scenarios under a variety of parameter assumptions. For example, the first value in the row labeled “Liver disease stage transitions / Low” is \$288,100, which states the incremental cost per QALY attained (the incremental cost-effectiveness ratio) for a patient with a starting fibrosis level of F0 is \$288,100 when comparing initiating treatment at F0 versus initiating treatment at F1 (i.e., Tx at F0 vs. F1). Sensitivity analyses are organized by parameter group, assuming a 55-year-old hepatitis C patient, with treatment of hepatitis C characterized by a generalized all-oral, direct-acting antiviral. All costs are in US\$2012. To simplify presentation, all numbers were rounded to nearest hundred. F0, F1, F2, and F3 = stages of liver disease; ESLD = end stage liver disease; QALY = quality-adjusted life-year; Tx = treatment.

† In these scenarios, treatment at F1 is dominated by treatment at F0 so the ICERs presented compare treatment at F0 with treatment at F2.

‡ Within the “Quality of life assumptions” scenarios, the favorable scenario uses the high values for QALY (Table 1) associated with being HCV-uninfected and uses the low value for the QALY multiplier (Table 1), thereby maximizing the difference between quality of life among infected and uninfected populations.

## **Appendix H. Additional threshold analyses**

In this appendix, additional threshold analyses were conducted, where important assumptions in the model were varied. In particular, we solved for the threshold treatment cost, as was done in Figure 2 of the main text, while assuming high and low values for specific parameter groups and using two different ICER targets. The two ICER targets are \$50,000/QALY and \$100,000/QALY. From these results, a large range of treatment cost thresholds is observed. When just the QALY parameter values are varied, the treatment cost threshold ranges from \$2,427 to \$259,694 among the scenarios yielding \$50,000/QALY. The results that yielded \$100,000/QALY (final column in Table H1) produce greater threshold treatment cost values because the ICER target has doubled from \$50,000/QALY to \$100,000/QALY.

**Table H1. Results of threshold analyses to identify the treatment cost necessary to yield a incremental cost-effectiveness ratio of \$50,000/QALY and \$100,000/QALY for the treatment of a patient with liver fibrosis of F0, assuming high and low values of several parameter groups.\***

| Parameter group varied          |                        | Threshold treatment cost<br>(\$US2012) |                          |
|---------------------------------|------------------------|----------------------------------------|--------------------------|
|                                 |                        | ICER =<br>\$50,000/QALY                | ICER =<br>\$100,000/QALY |
| None                            | Base case <sup>a</sup> | 22,210                                 | 42,378                   |
| Epidemiological parameters      |                        |                                        |                          |
| Liver disease stage transitions | Low <sup>a</sup>       | 18,724                                 | 35,795                   |
|                                 | High                   | 27,352                                 | 52,208                   |
| Treatment effectiveness         | Low                    | 12,383                                 | 23,663                   |
|                                 | High <sup>a</sup>      | 24,467                                 | 46,695                   |
| ESLD transitions                | Low <sup>a</sup>       | 21,904                                 | 41,797                   |
|                                 | High                   | 22,929                                 | 43,825                   |
| Disease-induced deaths          | Low <sup>a</sup>       | 22,178                                 | 42,246                   |
|                                 | High <sup>a</sup>      | 22,241                                 | 42,477                   |
| Health economic parameters      |                        |                                        |                          |
| Non-treatment medical costs     | Low <sup>a</sup>       | 23,232                                 | 43,400                   |
|                                 | High                   | 41,352                                 | 61,651                   |
| ESLD medical costs              | Low <sup>a</sup>       | 22,133                                 | 42,301                   |
|                                 | High <sup>a</sup>      | 22,334                                 | 42,502                   |
| Quality of life assumptions     | Favor Tx <sup>a</sup>  | 259,694                                | 517,347                  |
|                                 | Disfavor Tx            | 2,427                                  | 2,878                    |
| Discount rate                   | Low <sup>a</sup>       | 47,280                                 | 90,172                   |
|                                 | High                   | 15,735                                 | 30,076                   |

\* All costs are presented as US\$2012. For example, in the row labeled “Treatment effectiveness” / “Low” the value 12,383 indicates a treatment cost of \$12,383 per year (or per complete dose) yields a incremental cost effectiveness ratio of \$50,000/QALY for the treatment of patients in F0 relative to F2 for a hepatitis C patient who is 55 years old. F0, F1, F2, F3, F4 = stages of liver disease; ICER = incremental cost-effectiveness ratio; QALY = quality-adjusted life year.

<sup>a</sup>. Treatment policies being compared are F0 vs. F2, because treatment at F0 dominates treatment at F1. In all other cases, the policies being compared are F0 vs. F1.

We also investigated the treatment cost thresholds under different levels of fibrosis and patient ages (Table H2). The treatment cost thresholds among patients diagnosed with F2 liver fibrosis are greater than the corresponding treatment cost thresholds for patients diagnosed at F1 or F0. In general, a patient diagnosed in a later stage of liver disease (e.g., diagnosed at F1 or F2 relative to diagnosed at F0) are more likely to progress to end stage liver disease sequelae. Therefore, the benefits to a successful

treatment are greater and the treatment cost that yields a given cost-effectiveness threshold are greater. These results indicate that the range treatment costs that yield a particular cost-effective threshold vary substantially across fibrosis level, patient age, and the assumed cost-effectiveness threshold.



**Table H2. Results of threshold analyses to identify the treatment cost necessary to yield a incremental cost-effectiveness ratio of \$50,000/QALY and \$100,000/QALY for the treatment of a patient with liver fibrosis of F0, F1, F2, F3, and F4, where patients are also stratified by age groups.\***

| ICER = \$50,000/QALY          |             |             |                     |                     |
|-------------------------------|-------------|-------------|---------------------|---------------------|
| Patient fibrosis level        | 35 year old | 45 year old | 55 year old         | 65 year old         |
| Fibrosis at F0, treated at F0 | 30,201      | 26,843      | 22,210 <sup>a</sup> | 15,907 <sup>a</sup> |
| Fibrosis at F1, treated at F1 | 47,281      | 39,678      | 30,866              | 21,392              |
| Fibrosis at F2, treated at F2 | 237,599     | 184,633     | 128,835             | 76,089              |
| Fibrosis at F3, treated at F3 | 1,254,419   | 994,841     | 713,556             | 433,003             |
| Fibrosis at F4, treated at F4 | 331,725     | 277,236     | 214,241             | 146,588             |

  

| ICER = \$100,000/QALY         |             |             |             |             |
|-------------------------------|-------------|-------------|-------------|-------------|
| Patient fibrosis level        | 35 year old | 45 year old | 55 year old | 65 year old |
| Fibrosis at F0, treated at F0 | 57,727      | 51,305      | 42,378      | 30,362      |
| Fibrosis at F1, treated at F1 | 90,066      | 75,519      | 58,719      | 40,699      |
| Fibrosis at F2, treated at F2 | 450,769     | 349,162     | 242,802     | 142,927     |
| Fibrosis at F3, treated at F3 | 2,380,306   | 1,880,715   | 1,342,951   | 810,722     |
| Fibrosis at F4, treated at F4 | 655,590     | 544,758     | 417,378     | 281,868     |

\* All costs are presented as US\$2012. For example, in the row labeled “Fibrosis at F1, treated at F1” the value 47,281 indicates a treatment cost of \$47,281 per year (or per complete dose) yields an incremental cost effectiveness ratio of \$50,000/QALY for the treatment of patients in F1 relative to treatment in F2 for a hepatitis C patient who is 35 years old. F0, F1, F2, F3, F4 = stages of liver disease; ICER = incremental cost-effectiveness ratio; QALY = quality-adjusted life year.

<sup>a</sup> Treatment policies being compared are F0 vs. F2, because treatment at F0 dominates treatment at F1. In all other cases, the policies being compared are F0 vs. F1.

## Appendix I. Additional notes

Recent cost-effectiveness analyses have looked at HCV screening practices<sup>24,25</sup> and the implications of the latest generation of HCV pharmaceuticals, known as direct acting antivirals or protease inhibitors.<sup>26-29</sup> Although we know of no other study to assess the cost-effectiveness of HCV treatment by liver disease stage at diagnosis using treatment cost and treatment effectiveness parameter values relevant to the newer generation pharmaceuticals for HCV treatment, our results are generally consistent with other recent assessments of the cost-effectiveness of HCV treatment scenarios.<sup>27,30,31</sup> For example, the incremental cost-effectiveness of triple therapy using direct-acting antivirals (without stratifying for liver disease stage) was between \$29,200 and \$88,900 per QALY when comparing triple therapy to dual therapy, assuming a lower treatment cost than we posit for current all-oral therapies.<sup>27</sup> Another recent study finds the cost effectiveness of triple therapy to be between \$62,900 and \$102,600 per QALY when comparing triple therapy to dual therapy among mildly fibrotic patients, and between \$32,800 and \$54,100 per QALY when comparing triple therapy to dual therapy among patients with advanced fibrosis.<sup>31</sup> In similar fashion, a study that compares all-oral therapy to conventional therapy (dual therapy for genotypes 2/3 and triple therapy for genotype 1) does so without specific regard to the incremental cost effectiveness of treatment at different fibrosis level.<sup>26</sup> In their base case, they find the cost effectiveness of all oral therapy versus triple therapy to be \$44,500 per QALY.<sup>26</sup> Their study assumes an all-oral therapy regimen is similar in cost and in some cases less expensive than triple therapy, which would contribute lower cost-effectiveness ratios than would be produced using our base case assumptions. Both studies<sup>26,31</sup> differ from our study because they evaluate different therapy types (comparing all-oral therapy to triple therapy or comparing triple therapy to dual therapy) while assuming a given distribution of fibrosis levels for their modeled population. Our study assumes a generalized

treatment type (characterized by treatment cost and effectiveness) and evaluates the scheduling of this treatment with respect to liver disease progression.

The progression rates we used carry the assumptions that liver fibrosis regression does not occur among HCV-infected or HCV-uninfected patients, and that fibrosis progression does not occur among HCV-uninfected patients. Evidence for fibrosis regression, particularly among HCV-uninfected patients, is growing.<sup>32,33</sup> Including the possibility of fibrosis regression among HCV-uninfected patients would make HCV treatment even more beneficial and might have improved the relative cost-effectiveness of earlier initiation of treatment. Evidence is also growing for mortality associated with HCV-infected individuals for causes other than liver-related diseases.<sup>34</sup> The current model assumes HCV-related deaths occur only during the most advanced stages of liver diseases. If HCV infection causes or contributes to premature deaths from non-liver-related causes among patients, then our model's estimates of disease-related deaths are low and treatment cost-effectiveness may be underestimated. Finally, due to the focus of this study on the US baby-boomer cohort, this model considers neither the potential for re-acquiring infection (through on-going drug use) nor any herd-immunity effects among sustained responders who continue to inject drugs. The magnitude of these forces remains the subject of discussion<sup>35-37</sup> and may also vary between the context, location, and scope of a given study. As with the omission of fibrosis regression and additional non-liver-related mortalities, inclusion of herd immunity effects may make treatment more beneficial and thereby improve treatment cost-effectiveness. Since the threshold analysis assumes a given cost-effectiveness ratio and estimates a cost-effective level for a given model parameter (i.e., treatment cost), by underestimating treatment cost-effectiveness (via omitting of fibrosis regression, excess mortality, and herd immunity) we may under-estimate the corresponding threshold levels of treatment cost. Since fibrosis regression and excess mortality are emerging ideas in hepatitis C research, there was no

widespread consensus on possible parameter values, therefore we judged the inclusion of these aspects in the cost-effectiveness model would be too tenuous until further consensus developed. In the case of herd-immunity, this aspect of viral hepatitis seemed to be an inappropriate assumption for our population of interest, who are older in age and presumed to be no longer susceptible to re-infection because either their risk behaviors have changed since their initial infection or the conduit for their infection (i.e., contaminated blood transfusion) has been resolved.

## References

1. Murphy SL, Xu J, Kochanek KD. Deaths: Final Data for 2010. In: Statistics DoV, ed. National Vital Statistics Reports: Centers for Disease Control and Prevention, National Center for Health Statistics; 2013:1-117.
2. Yi Q, Wang P, Krahn M. Improving the accuracy of long-term prognostic estimates in hepatitis C virus infection. *J Viral Hepatitis* 2004;11:166-74.
3. Thein HH, Yi Q, Dore GJ, Krahn MD. Estimation of stage-specific fibrosis progression rates in chronic hepatitis C virus infection: A meta-analysis and meta-regression. *Hepatology* 2008;48:418-31.
4. Poynard T, Bedossa P, Opolon P. Natural history of liver fibrosis progression in patients with chronic hepatitis C. *The Lancet* 1997;349:825-32.
5. Hoefs JC, Shiffman ML, Goodman ZD, Kleiner DE, Dienstag JL, Stoddard AM. Rate of progression of hepatic fibrosis in patients with chronic hepatitis C: results from the HALT-C Trial. *Gastroenterology* 2011;141:900-8.
6. Moorman AC, Gordon SC, Rupp LB, et al. Baseline characteristics and mortality among people in care for chronic viral hepatitis: the chronic hepatitis cohort study. *Clinical Infect Dis* 2013;56:40-50.
7. Morgan RL, Baack B, Smith BD, Yartel A, Pitasi M, Falck-Ytter Y. Eradication of hepatitis C virus infection and the development of hepatocellular carcinoma: a meta-analysis of observational studies. *Ann of Intern Med* 2013;158:329-37.
8. van der Meer AJ, Veldt BJ, Feld JJ, et al. Association between sustained virological response and all-cause mortality among patients with chronic hepatitis C and advanced hepatic fibrosis: sustained virological response and all-cause mortality. *JAMA-J Am Med Assoc* 2012;308:2584-93.

9. Townsend R, McEwan P, Kim R, Yuan Y. Structural frameworks and key model parameters in cost-effectiveness analyses for current and future treatments of chronic hepatitis C. *Value Health* 2011;14:1068-77.
10. Wong JB, Bennett WG, Koff RS, Pauker SG. Pretreatment evaluation of chronic hepatitis C. *JAMA-J Am Med Assoc* 1998;280:2088-93.
11. Bennett WG, Inoue Y, Beck JR, Wong JB, Pauker SG, Davis GL. Estimates of the cost-effectiveness of a single course of interferon- $\alpha$ 2b in patients with histologically mild chronic hepatitis C. *Ann of Intern Med* 1997;127:855-65.
12. Carithers Jr RL, Sugano D, Bayliss M. Health assessment for chronic HCV infection. *Dig Dis Sci* 1996;41:75S-80S.
13. Bernstein D, Kleinman L, Barker CM, Revicki DA, Green J. Relationship of health-related quality of life to treatment adherence and sustained response in chronic hepatitis C patients. *Hepatology* 2002;35:704-8.
14. Foster G, Goldin R, Thomas H. Chronic hepatitis C virus infection causes a significant reduction in quality of life in the absence of cirrhosis. *Hepatology* 1998;27:209-12.
15. Schwarzinger M, Dewedar S, Rekacewicz C, et al. Chronic hepatitis C virus infection: does it really impact health-related quality of life? A study in rural Egypt. *Hepatology* 2004;40:1434-41.
16. Castera L, Constant A, Bernard P-H, de Ledinghen V, Couzigou P. Psychological impact of chronic hepatitis C: comparison with other stressful life events and chronic diseases. *World J of Gastroent* 2006;12:1545.
17. Rodger AJ, Jolley D, Thompson SC, Lanigan A, Crofts N. The impact of diagnosis of hepatitis C virus on quality of life. *Hepatology* 1999;30:1299-301.

18. Spiegel BM, Younossi ZM, Hays RD, Revicki D, Robbins S, Kanwal F. Impact of hepatitis C on health related quality of life: a systematic review and quantitative assessment. *Hepatology* 2005;41:790-800.
19. Siebert U, Sroczynski G, Rossol S, et al. Cost effectiveness of peginterferon  $\alpha$ -2b plus ribavirin versus interferon  $\alpha$ -2b plus ribavirin for initial treatment of chronic hepatitis C. *Gut* 2003;52:425-32.
20. Weinstein MC, Stason WB. Foundations of cost-effectiveness analysis for health and medical practices. *New Engl J Med* 1977;296:716-21.
21. Haddix AC, Teutsch SM, Corso PS. Prevention effectiveness: a guide to decision analysis and economic evaluation: Oxford University Press; 2003.
22. Gold MR. Cost-effectiveness in health and medicine: Oxford University Press; 1996.
23. Bureau of Labor and Statistics, US Government. Table 2.4.4U. Price Indexes for Personal Consumption Expenditures by Type of Product. Washington DC 2013.
24. Rein DB, Smith BD, Wittenborn JS, et al. The cost-effectiveness of birth-cohort screening for hepatitis C antibody in US primary care settings. *Ann Intern Med* 2012;156:263-70.
25. Eckman MH, Talal AH, Gordon SC, Schiff E, Sherman KE. Cost-effectiveness of screening for chronic hepatitis C infection in the United States. *Clin Infect Dis* 2013;56:1382-93.
26. Hagan LM, Yang Z, Ehteshami M, Schinazi RF. All-oral, interferon-free treatment for chronic hepatitis C: cost-effectiveness analyses. *J Viral Hepatitis* 2013;20:847-857.
27. Chan K, Lai MN, Groessl EJ, et al. Cost effectiveness of direct-acting antiviral therapy for treatment-naive patients with chronic HCV genotype 1 infection in the veterans health administration. *Clin Gastroenterol H* 2013;11:1503-10.

28. Elbasha EH, Chhatwal J, Ferrante SA, El Khoury AC, Laires PA. Cost-effectiveness analysis of boceprevir for the treatment of chronic hepatitis C virus genotype 1 infection in Portugal. *Applied Health Economics and Health Policy* 2013;11:65-78.
29. Camma C, Petta S, Enea M, et al. Cost-effectiveness of boceprevir or telaprevir for untreated patients with genotype 1 chronic hepatitis C. *Hepatology* 2012;56:850-60.
30. Wong JB, Koff RS. Watchful waiting with periodic liver biopsy versus immediate empirical therapy for histologically mild chronic hepatitis C: a cost-effectiveness analysis. *Ann Intern Med* 2000;133:665-75.
31. Liu S, Cipriano LE, Holodniy M, Owens DK, Goldhaber-Fiebert JD. New protease inhibitors for the treatment of chronic hepatitis C: a cost-effectiveness analysis. *Ann Intern Med* 2012;156:279-90.
32. Arif A, Levine RA, Sanderson SO, et al. Regression of fibrosis in chronic hepatitis C after therapy with interferon and ribavirin. *Dig Dis Sci* 2003;48:1425-30.
33. Zois C, Baltayiannis G, Karayiannis P, Tsianos E. Systematic review: hepatic fibrosis—regression with therapy. *Aliment Pharmacol Ther* 2008;28:1175-87.
34. Ly KN, Xing J, Klevens RM, Jiles RB, Holmberg SD. Causes of death and characteristics of decedents with viral hepatitis, United States, 2010. *Clin Infect Dis* 2013;58:40-49.
35. Martin NK, Vickerman P, Miners A, et al. Cost-effectiveness of hepatitis C virus antiviral treatment for injection drug user populations. *Hepatology* 2012;55:49-57.
36. Visconti AJ, Doyle JS, Weir A, Shiell AM, Hellard ME. Assessing the cost-effectiveness of treating chronic hepatitis C virus in people who inject drugs in Australia. *J Gastroenterol Hepatol* 2013;28:707-16.
37. Martin NK, Vickerman P, Miners A, Hickman M. How cost-effective is hepatitis C virus treatment for people who inject drugs? *J Gastroenterol Hepatol* 2013;28:590-2.
